# Supplementary material for: Ex utero intrapartum therapy in infants with congenital diaphragmatic hernia: a propensity score matching analysis
Source: HighWire-hosted journal article supplement (doi:10.1136/wjps-2022-000425), 2022-07-01
Supplement: wjps-2022-000425supp001_data_supplement.pdf [file wjps-2022-000425supp001_data_supplement.pdf]

Supplementary Figures

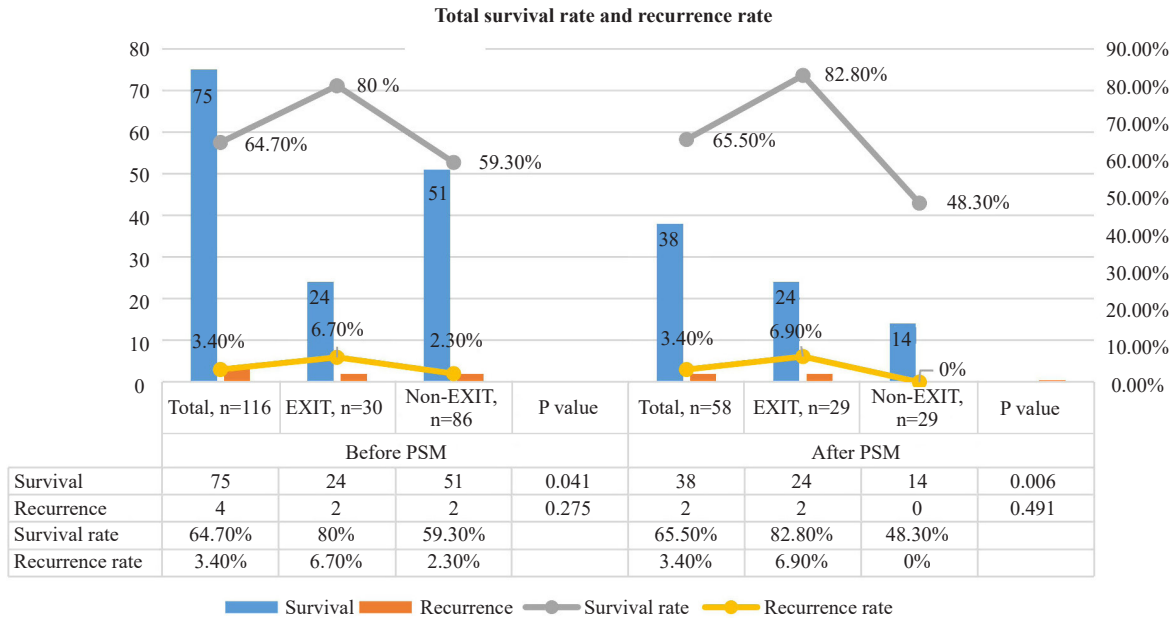

Supplementary Figure 1. Overall survival rate and recurrence rate.

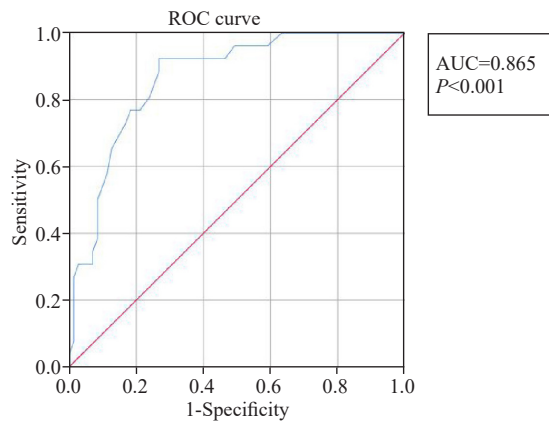

**Supplementary Figure 2. ROC of logistic multivariable regression model of independent predictors of overall survival (Before PSM).**

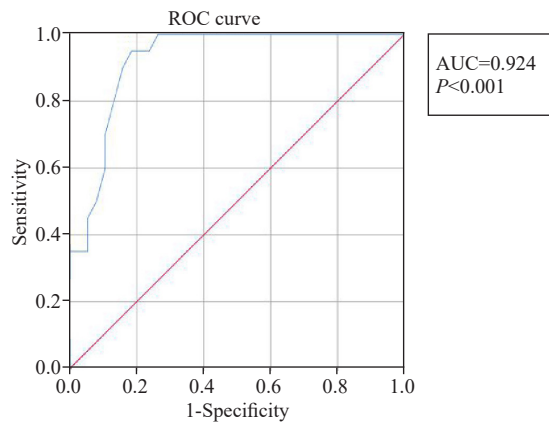

**Supplementary Figure 3. ROC of logistic multivariable regression model of independent predictors of overall survival (After PSM).**

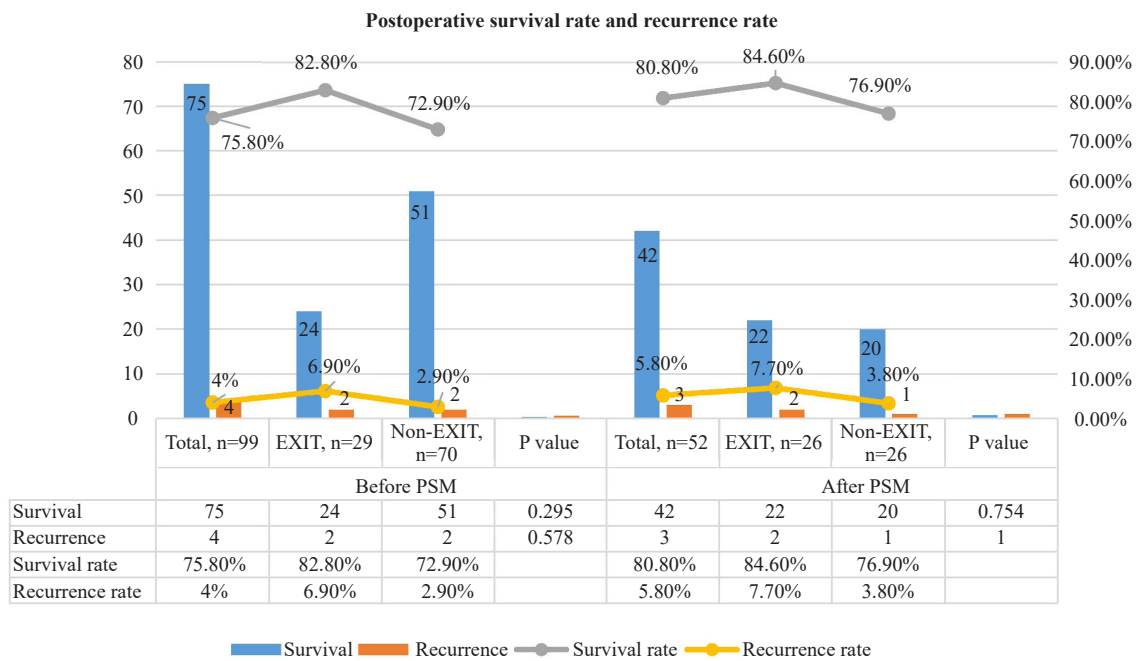

**Supplementary Figure 4. Postoperative survival rate and recurrence rate.**

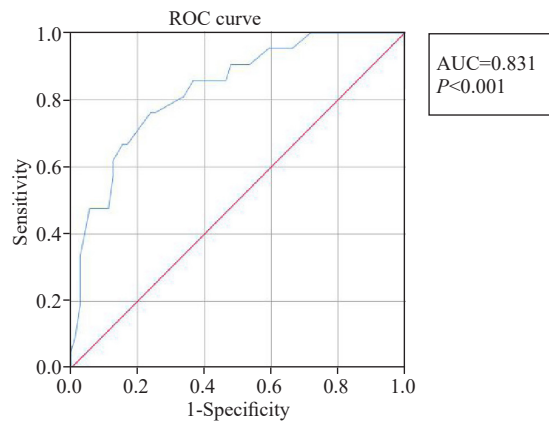

**Supplementary Figure 5. ROC of logistic multivariable regression model of independent predictors of postoperative survival (Before PSM).**

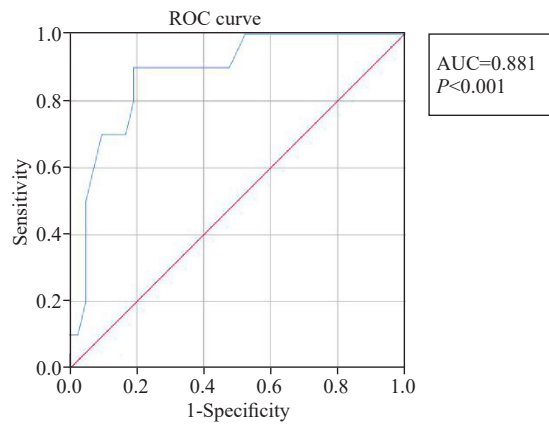

**Supplementary Figure 6. ROC of logistic multivariable regression model of independent predictors of postoperative survival (After PSM).**

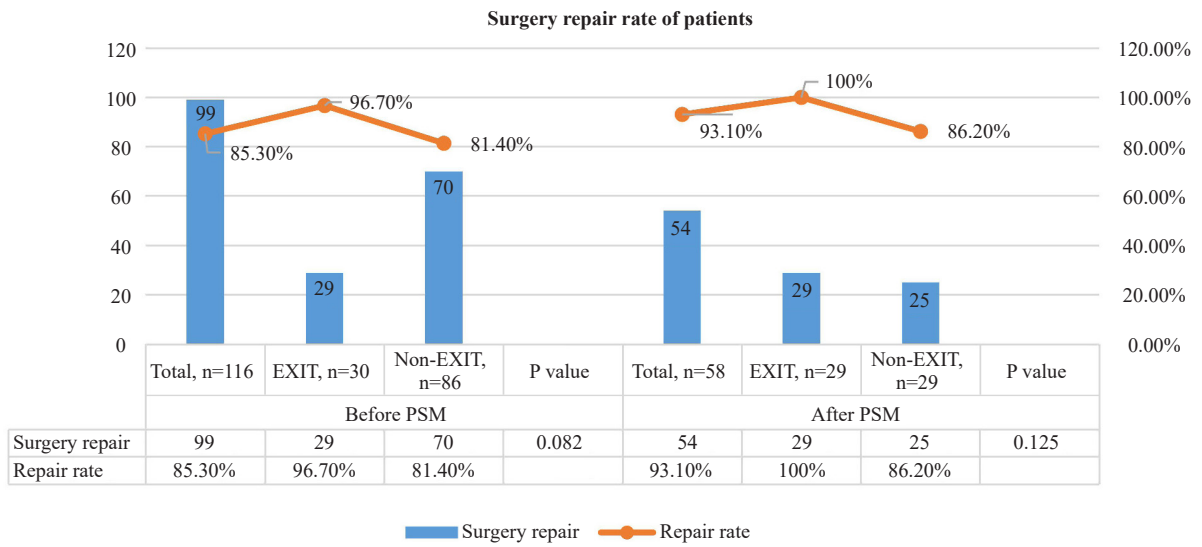

**Supplementary Figure 7. Surgery repair rate of patients.**
